# Supplementary material for: Integrating photosystem II into a porous TiO2 nanotube network toward highly efficient photo-bioelectrochemical cells
Source: Royal Society of Chemistry journal article supplement (doi:10.1039/c6ta04964h), 2016-01-01
Supplement: c6ta04964h1.pdf [file c6ta04964h1.pdf]

**Electronic Supplementary Material (ESI) for Journal of Materials Chemistry A.**  
**This journal is © The Royal Society of Chemistry 2016.**

## **Electronic Supporting Information**

### **Integrating photosystem II into porous TiO<sub>2</sub> nanotube network toward highly-efficient photo-bioelectrochemical cells**

Jiao Li,<sup>ab</sup> Xiyun Feng,<sup>ac</sup> Jinbo Fei,<sup>ac</sup> Peng Cai,<sup>ac</sup> Jianguo Huang<sup>\*b</sup> and Junbai Li<sup>\*ac</sup>

*<sup>a</sup>Beijing National Laboratory for Molecular Sciences (BNLMS), CAS Key Lab of Colloid, Interface and Chemical Thermodynamics, Institute of Chemistry, Chinese Academy of Sciences, Beijing 100190, China.*

*E-mail: jbli@iccas.ac.cn; Fax: +86 10 82612629; Tel: +86 10 82614087*

*<sup>b</sup>Department of Chemistry, Zhejiang University, Hangzhou, Zhejiang 310027, China.*

*E-mail: jghuang@zju.edu.cn; Fax: +86 571 87951202; Tel: +86 571 87951202*

*<sup>c</sup>University of Chinese Academy of Sciences, Beijing 100049, China.*

#### **Incident Photon-to-current Conversion Efficiency Measurements**

The incident photon-to-current conversion efficiencies (IPCE) of the PSII/(TiO<sub>2</sub>)<sub>5</sub>-NTs-modified ITO electrode were calculated utilizing the following equation:

$$\text{IPCE} = jhc/eP\lambda$$

where  $h$  is Planck's constant,  $c$  is the vacuum velocity of light,  $\lambda$  is the central wavelength of the incident light and  $e$  is the charge of an electron. The generated photocurrent density ( $j$ ) and the light power density ( $P$ ) were recorded in the corresponding photoelectrochemical measurement. It was supposed that all incident photons were absorbed by the hybrid photoanode.

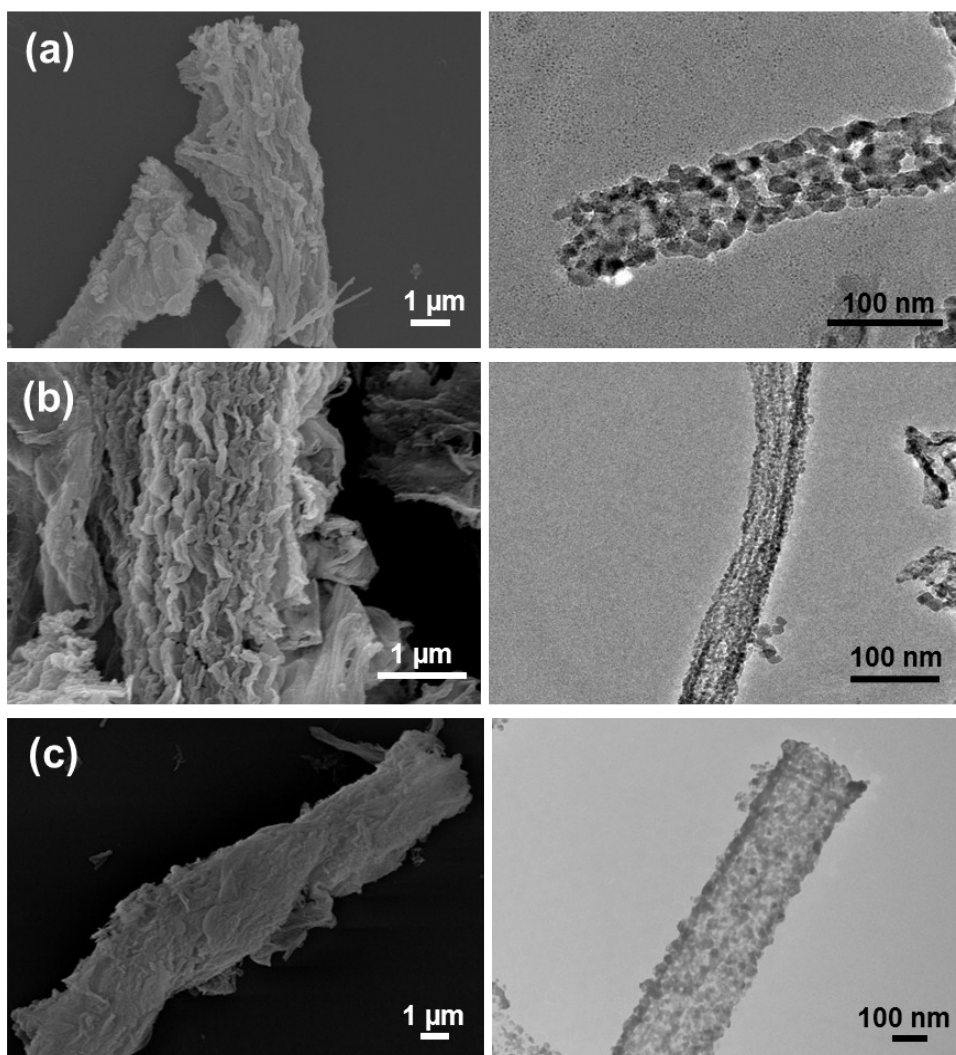

**Fig. S1** Left column shows overview FE-SEM images of  $(\text{TiO}_2)_5$ -NTs (a),  $(\text{TiO}_2)_{10}$ -NTs (b) and  $(\text{TiO}_2)_{20}$ -NTs (c). Right column displays TEM images of the corresponding individual titania nanotube.

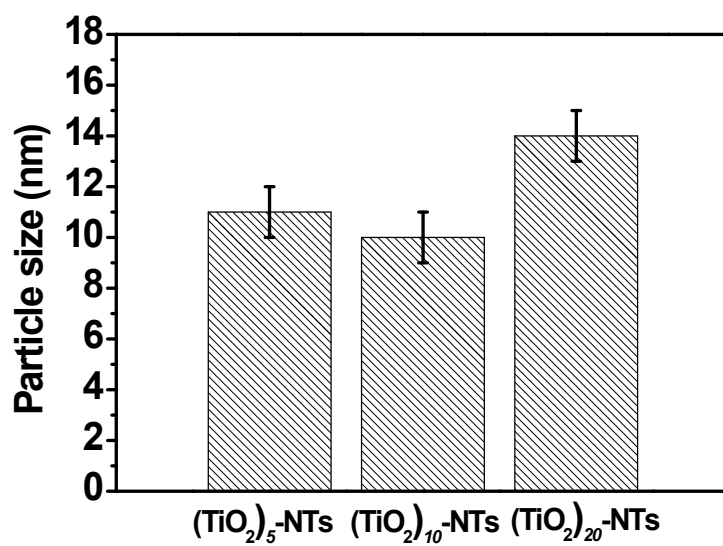

**Fig. S2** Average sizes of the nanoparticles in  $(\text{TiO}_2)_5\text{-NTs}$ ,  $(\text{TiO}_2)_{10}\text{-NTs}$  and  $(\text{TiO}_2)_{20}\text{-NTs}$ . Error bars represent standard error of the mean, for  $N = 5$  independent experiments, and fifty nanoparticles were taken in each experiment.

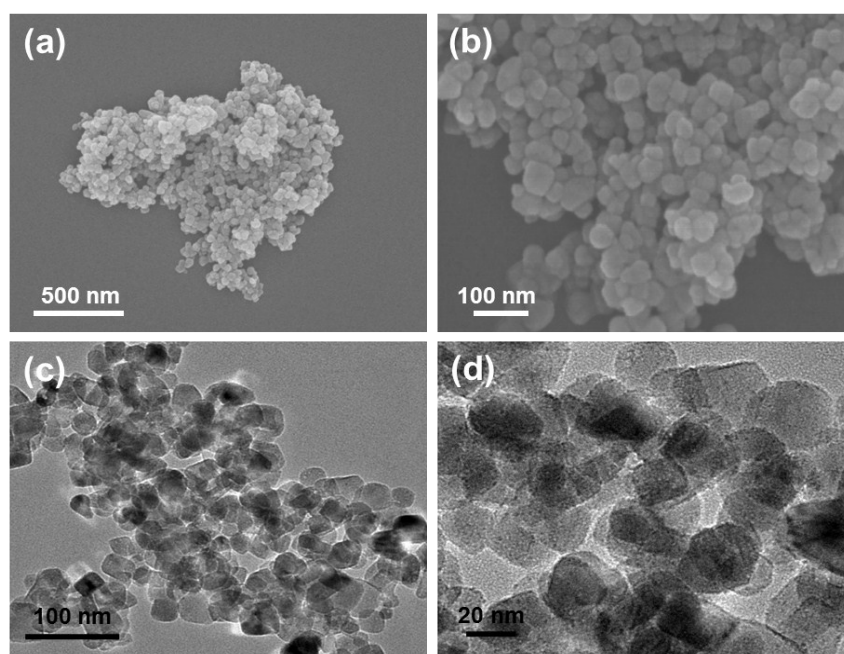

**Fig. S3** Overview (a) and enlarged (b) FE-SEM images of the commercial titania nanopowder ( $\text{TiO}_2(\text{C})$ ). Overview (c) and enlarged (d) TEM images of the commercial titania nanopowder ( $\text{TiO}_2(\text{C})$ ).

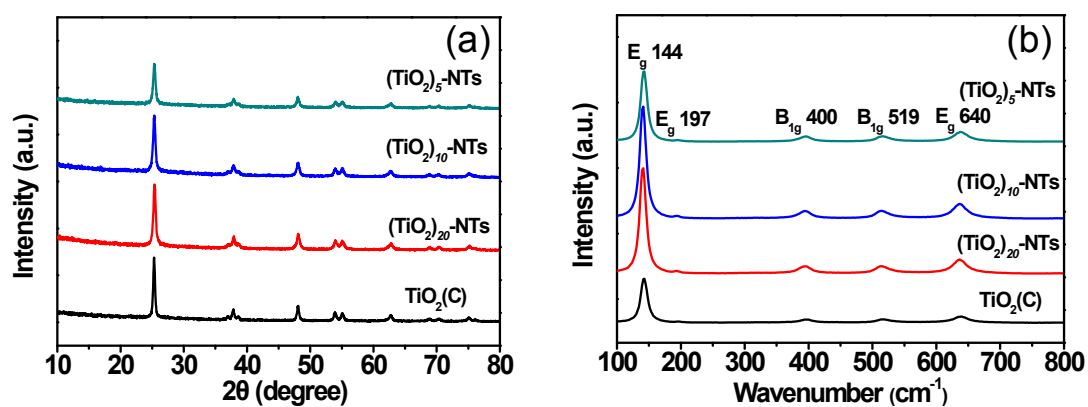

**Fig. S4** (a) XRD patterns and (b) Raman spectra of  $(\text{TiO}_2)_5\text{-NTs}$ ,  $(\text{TiO}_2)_{10}\text{-NTs}$ ,  $(\text{TiO}_2)_{20}\text{-NTs}$  and  $\text{TiO}_2(\text{C})$ .

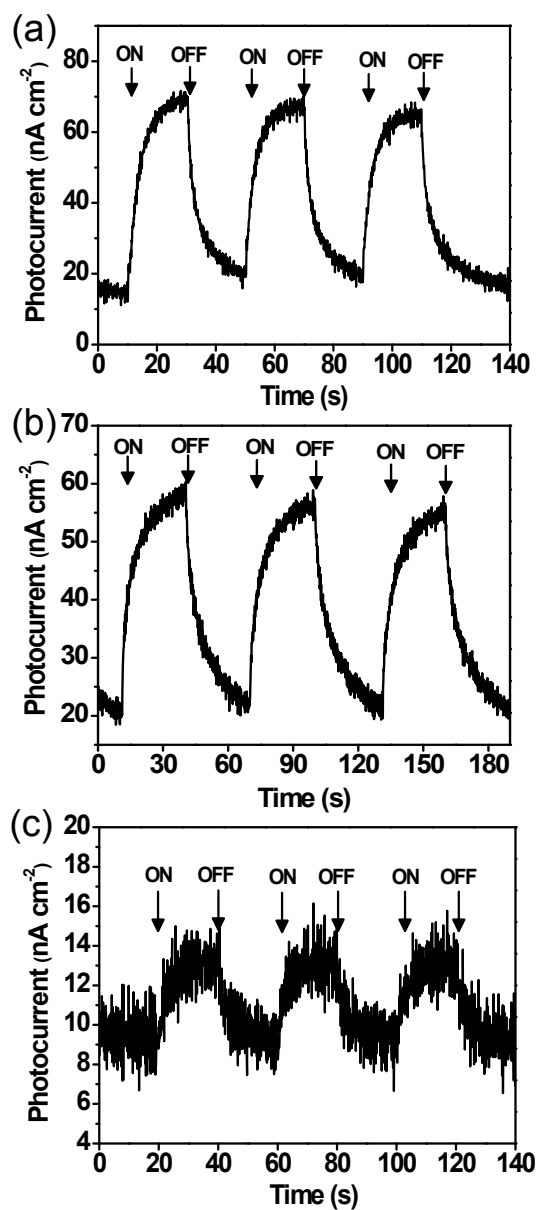

**Fig. S5** DET photocurrent responses of (a) PSII/(TiO<sub>2</sub>)<sub>10</sub>-NTs, (b) PSII/(TiO<sub>2</sub>)<sub>20</sub>-NTs and (c) PSII/TiO<sub>2</sub>(C)-modified ITO electrodes to repetitive illumination by red light ( $550 < \lambda < 800$  nm,  $10 \text{ mW cm}^{-2}$ ) and darkness cycles. A bias potential of +0.25 V vs. SCE was applied at 25 °C.

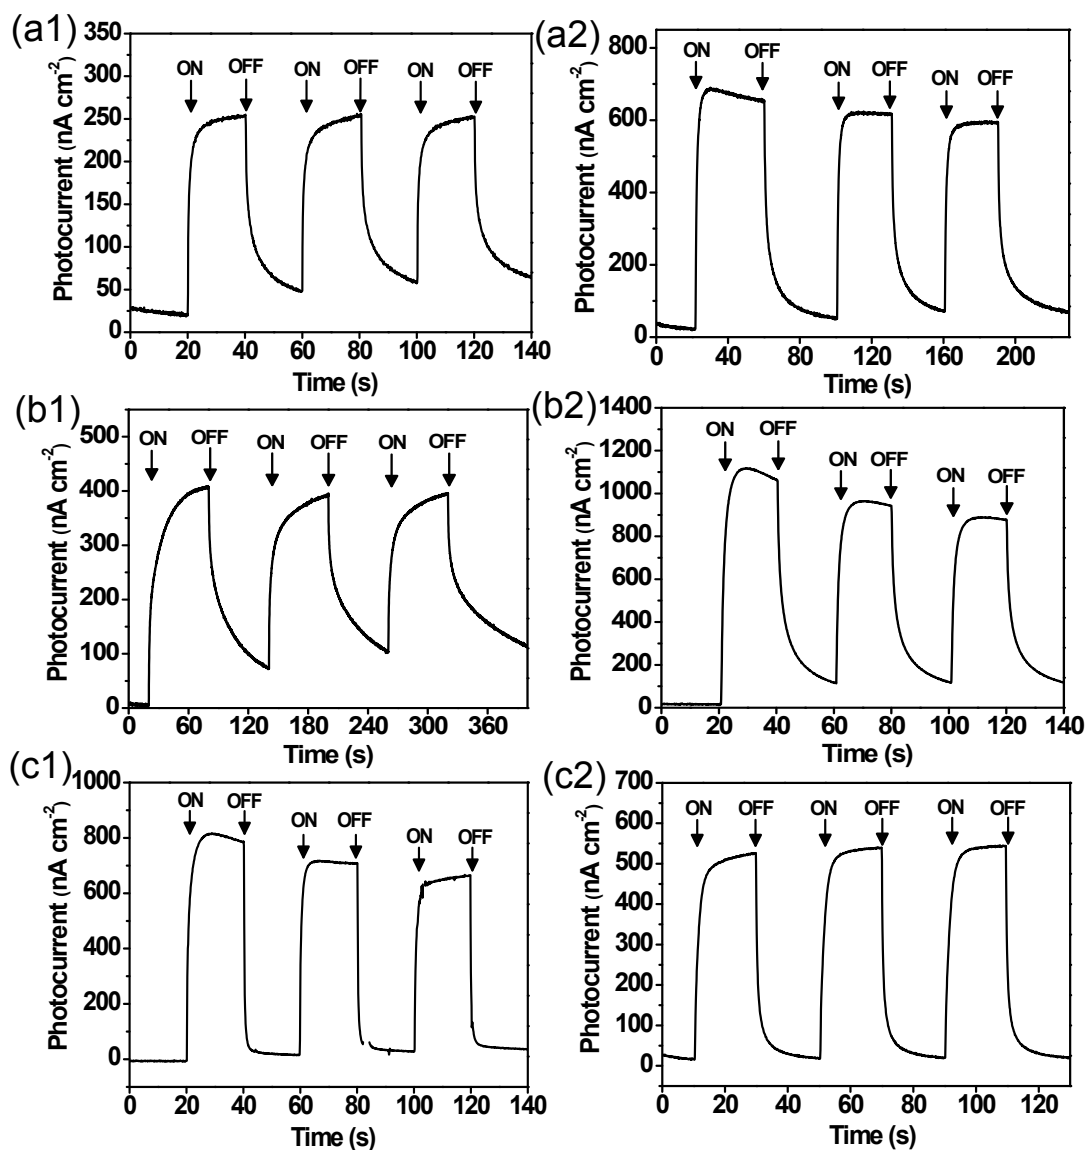

**Fig. S6** DET photocurrent responses of bare titania (a1) (TiO<sub>2</sub>)<sub>10</sub>-NTs, (b1) (TiO<sub>2</sub>)<sub>20</sub>-NTs and (c1) TiO<sub>2</sub>(C)-modified ITO electrodes to repetitive illumination by white light and darkness cycles. DET photocurrent responses of (a2) PSII/(TiO<sub>2</sub>)<sub>10</sub>-NTs, (b2) PSII/(TiO<sub>2</sub>)<sub>20</sub>-NTs and (c2) PSII/TiO<sub>2</sub>(C)-modified ITO electrodes to repetitive illumination by white light and darkness cycles. A bias potential of +0.25 V vs. SCE was applied at 25 °C.

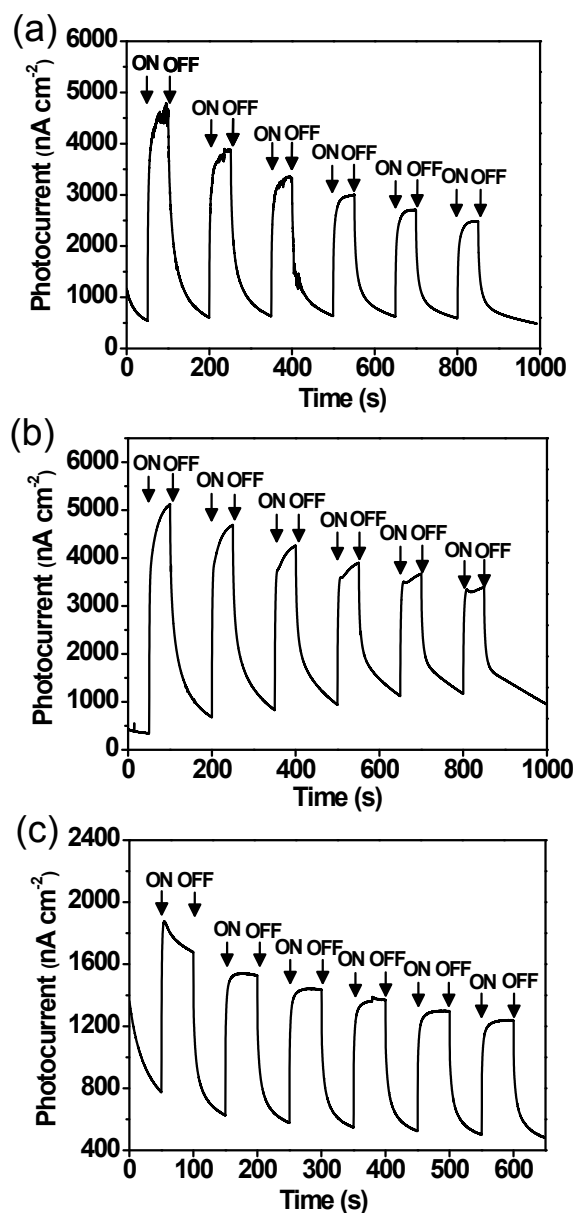

**Fig. S7** MET photocurrent responses of (a) PSII/(TiO<sub>2</sub>)<sub>10</sub>-NTs, (b) PSII/(TiO<sub>2</sub>)<sub>20</sub>-NTs and (c) PSII/TiO<sub>2</sub>(C)-modified ITO electrodes with 1 mM DCBQ in the electrolyte to repetitive illumination by red light ( $550 < \lambda < 800$  nm,  $10 \text{ mW cm}^{-2}$ ) and darkness cycles. A bias potential of +0.25 V vs. SCE was applied at 25 °C.

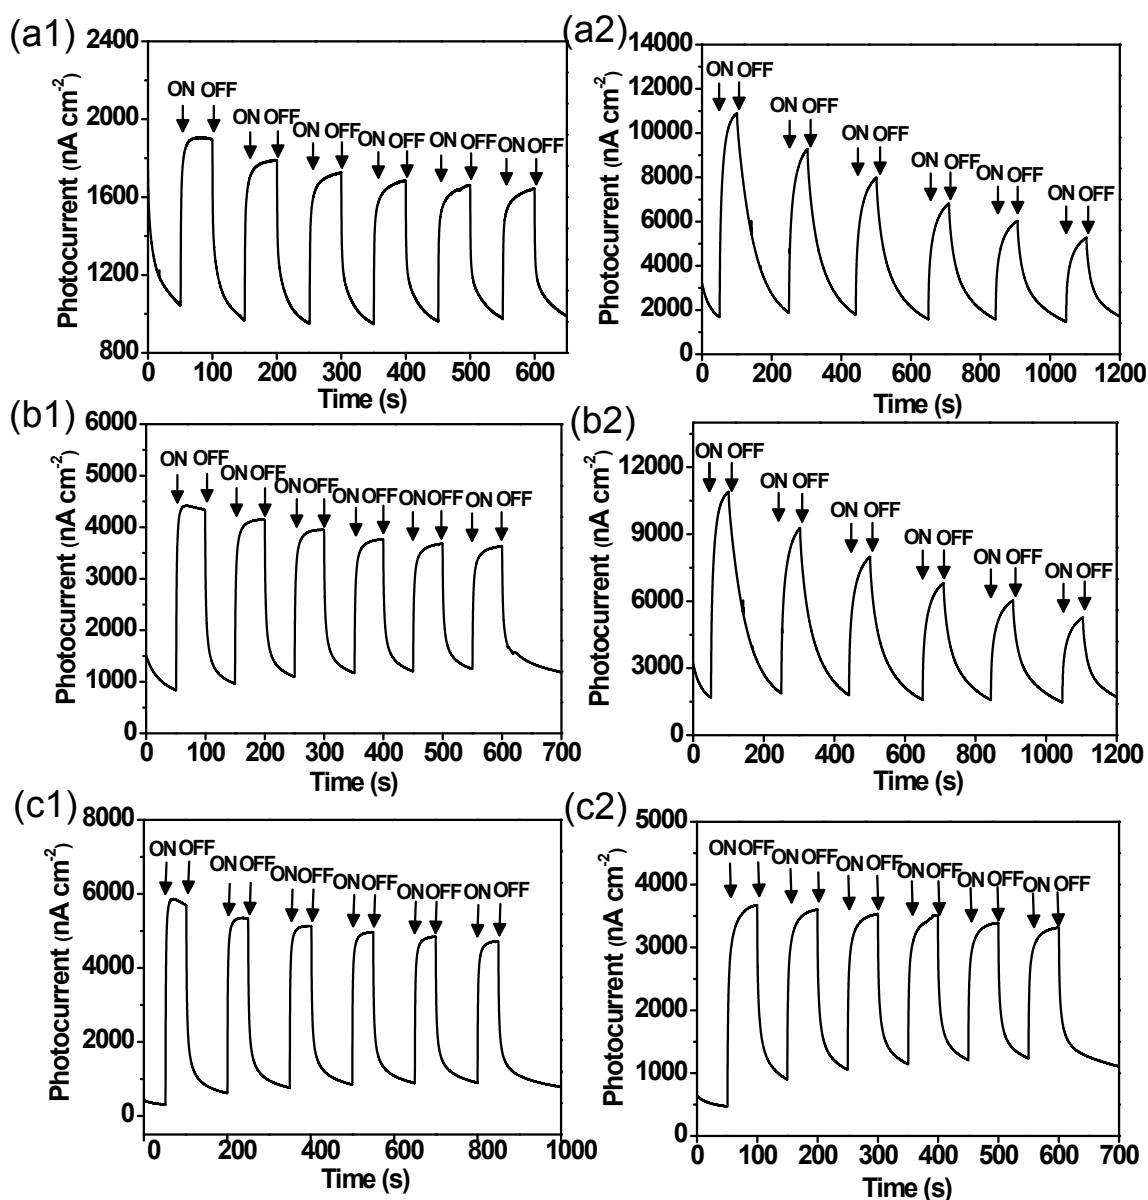

**Fig. S8** MET photocurrent responses of bare titania (a1)  $(\text{TiO}_2)_{10}$ -NTs, (b1)  $(\text{TiO}_2)_{20}$ -NTs and (c1)  $\text{TiO}_2(\text{C})$ -modified ITO electrodes with 1 mM DCBQ in the electrolyte to repetitive illumination by white light and darkness cycles. MET photocurrent responses of (a2) PSII/ $(\text{TiO}_2)_{10}$ -NTs, (b2) PSII/ $(\text{TiO}_2)_{20}$ -NTs and (c2) PSII/ $\text{TiO}_2(\text{C})$ -modified ITO electrodes with 1 mM DCBQ in the electrolyte to repetitive illumination by white light and darkness cycles. A bias potential of +0.25 V vs. SCE was applied at 25 °C.



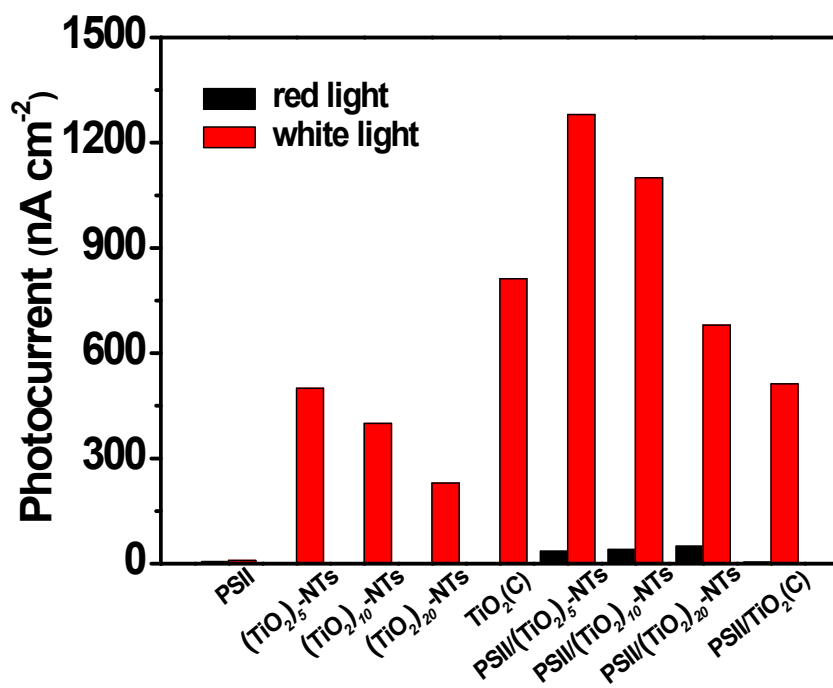

**Fig. S9** Comparisons of DET photocurrent responses of PSII, (TiO<sub>2</sub>)<sub>5</sub>-NTs, (TiO<sub>2</sub>)<sub>10</sub>-NTs, (TiO<sub>2</sub>)<sub>20</sub>-NTs, TiO<sub>2</sub>(C), PSII/(TiO<sub>2</sub>)<sub>5</sub>-NTs, PSII/(TiO<sub>2</sub>)<sub>10</sub>-NTs, PSII/(TiO<sub>2</sub>)<sub>20</sub>-NTs and PSII/TiO<sub>2</sub>(C)-modified ITO electrodes under red light and white light irradiations.

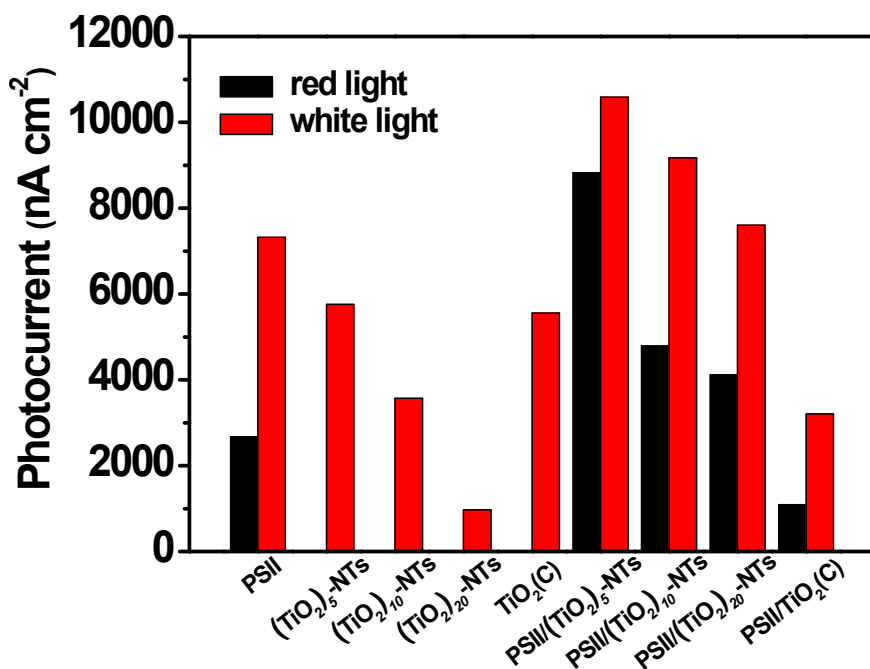

**Fig. S10** Comparisons of MET photocurrent responses of PSII, (TiO<sub>2</sub>)<sub>5</sub>-NTs, (TiO<sub>2</sub>)<sub>10</sub>-NTs, (TiO<sub>2</sub>)<sub>20</sub>-NTs, TiO<sub>2</sub>(C), PSII/(TiO<sub>2</sub>)<sub>5</sub>-NTs, PSII/(TiO<sub>2</sub>)<sub>10</sub>-NTs, PSII/(TiO<sub>2</sub>)<sub>20</sub>-NTs and PSII/TiO<sub>2</sub>(C)-modified ITO electrodes under red light and white light irradiations.

**Table S1** Summary of photoelectrochemical performance of PSII PF-PEC cells.

| Reference | Electrode                                                                 | origin              | Light (nm) | Bias potential (V vs. SCE) | $j$ ( $\mu\text{A cm}^{-2}$ ) |                   | Half-life time (min) | IPCE (%)         |                     |
|-----------|---------------------------------------------------------------------------|---------------------|------------|----------------------------|-------------------------------|-------------------|----------------------|------------------|---------------------|
|           |                                                                           |                     |            |                            | DET                           | MET               |                      |                  |                     |
| 23        | PSII/Ni-NTA/Au                                                            | <i>T. elongatus</i> | 675        | 0.26                       |                               | 14 <sup>a</sup>   | 18                   |                  |                     |
| 24        | PSII/Ni-NTA/Au                                                            | <i>T. vulcanus</i>  | 680        | 0.16                       | 0.13                          |                   |                      |                  |                     |
|           | PSII/Ni-NTA/Au (nanoparticles)                                            | <i>T. vulcanus</i>  | 680        | 0.16                       | 2.4                           |                   |                      |                  |                     |
| 26        | PSII/pMBQ/Au                                                              | <i>M. laminosus</i> | > 400      | 0.15                       |                               | 2.7               |                      | 1.0              |                     |
| 27        | PSII/Os redox polymer/Au                                                  | <i>T. elongatus</i> | 675        | 0.26                       |                               | 45                | ~ 55                 |                  |                     |
| 28        | PSII/PBV <sup>2+</sup> /PSII/PBV <sup>2+</sup>                            | <i>M. laminosus</i> | 675        | -0.04                      | 0.5                           |                   |                      | ~ 0.3            |                     |
| 31        | PSII/mesoITO                                                              | <i>T. elongatus</i> | 635        | 0.26                       | 1.6                           |                   | < 5                  |                  |                     |
|           |                                                                           |                     |            |                            |                               |                   |                      | 12 <sup>b</sup>  | 0.3 <sup>b</sup>    |
| 32        | PSII/C <sub>2</sub> CO <sub>2</sub> <sup>-</sup> /mesoITO (electrostatic) | <i>T. elongates</i> | 679        | 0.26                       | 0.28                          |                   | < 5                  | 0.005            |                     |
|           |                                                                           |                     |            |                            |                               |                   |                      | 1.4 <sup>a</sup> | 0.03 <sup>a</sup>   |
|           | PSII/C <sub>2</sub> CO <sub>2</sub> <sup>-</sup> /mesoITO (covalent)      | <i>T. elongates</i> | 679        | 0.26                       | 0.43                          |                   | ~ 12                 | 0.01             |                     |
| This work | PSII/(TiO <sub>2</sub> ) <sub>5</sub> -NTs/ITO                            | <i>spinach</i>      | 550 ~ 800  | 0.25                       | 0.035                         |                   |                      | ~ 0.0006         |                     |
|           |                                                                           |                     |            |                            |                               |                   |                      | 8.8 <sup>a</sup> | ~ 0.16 <sup>a</sup> |
|           |                                                                           |                     |            |                            |                               | White light       |                      | 1.3              | ~ 0.02              |
|           |                                                                           |                     |            |                            |                               | 10.6 <sup>a</sup> | ~ 0.19 <sup>a</sup>  |                  |                     |

<sup>a</sup> Mediated electron transfer using DCBQ. <sup>b</sup> Mediated electron transfer using potassium 1,4-naphthoquinone-2-sulfonate (NQS).
